# Supplementary material for: D-form KLKLLLLLKLK-NH2 peptide exerts higher antimicrobial properties than its L-form counterpart via an association with bacterial cell wall components
Source: PubMed Central journal article supplement (PMC5338256; doi:10.1038/srep43384), 2017-03-06
Supplement: srep43384-s1.pdf [file srep43384-s1.pdf]

# D-form KLKLLLLLKLK-NH2 peptide exerts higher antimicrobial properties than its L-form counterpart via an association with bacterial cell wall components

Takayuki Manabe and Kiyoshi Kawasaki<sup>#</sup>

## Supplementary information

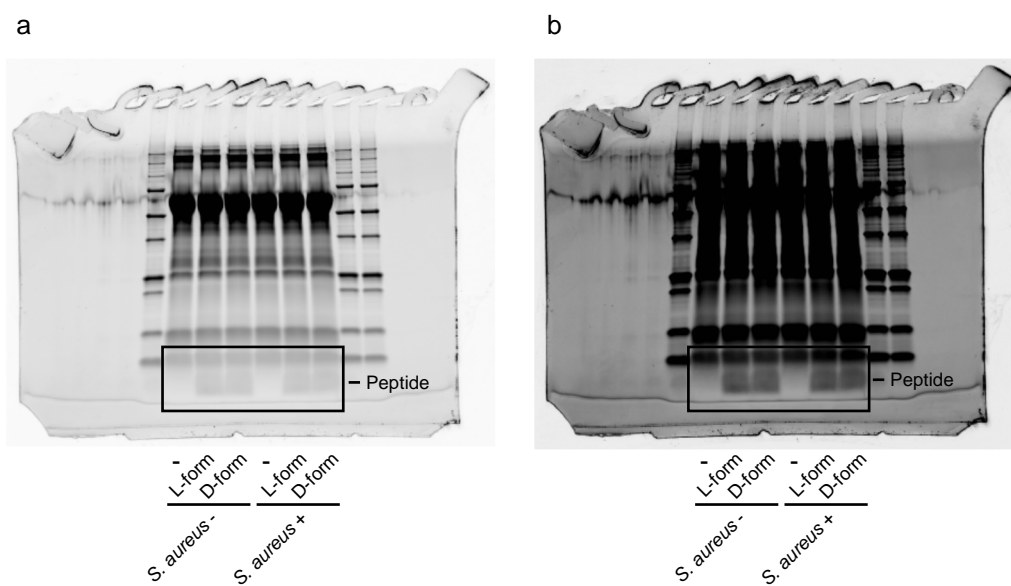

**Supplementary Figure 1. Multiple contrast images of full-length gel for Figure 1g.**

Figure 1g was prepared from image b.
